# Supplementary material
Source: PubMed Central journal article supplement (PMC4293117)
Supplement: NIHMS648821-supplement-Supplementary_data.pdf [file NIHMS648821-supplement-Supplementary_data.pdf]

**Supporting Information for “Field Measurement on the Emissions of PM, EC, OC, Parent, Nitro- and Oxy- Polycyclic Aromatic Hydrocarbons from Residential Briquette, Coal Cake, and Wood Combustions in Rural Shanxi, China”**

Guofeng SHEN<sup>1,2</sup>, Shu TAO<sup>1\*</sup>, Siye WEI<sup>1</sup>, Yuanchen CHEN<sup>1</sup>, Yanyan ZHANG<sup>1</sup>, Huizhong SHEN<sup>1</sup>, Ye HUANG<sup>1</sup>, Dan ZHU<sup>1</sup>, Chenyi YUAN<sup>1</sup>, Haochen WANG<sup>3</sup>, Yafei Wang<sup>3</sup>, Lijun PEI<sup>3</sup>, YiLan LIAO<sup>3</sup>, Yonghong DUAN<sup>4</sup>, Bin WANG<sup>1</sup>, Rong WANG<sup>1</sup>, Yan Lv<sup>1</sup>, Wei LI<sup>1</sup>, Xilong WANG<sup>1</sup>

- 1. Laboratory of Earth Surface Processes, College of Urban and Environmental Sciences, Peking University, Beijing, 100871, China*
- 2. Institute of Atmospheric Sciences, Jiangsu Academy of Environmental Sciences, Nanjing, 210036, China*
- 3. Institute of Population Research, Peking University, Beijing 100871, China*
- 4. College of Resources and Environment, Shanxi Agricultural University, Shanxi, 030800, China*

\* Corresponding author phone and fax: 0086-10-62751938, email: [taos@pku.edu.cn](mailto:taos@pku.edu.cn)

There are 5 tables and 2 figures

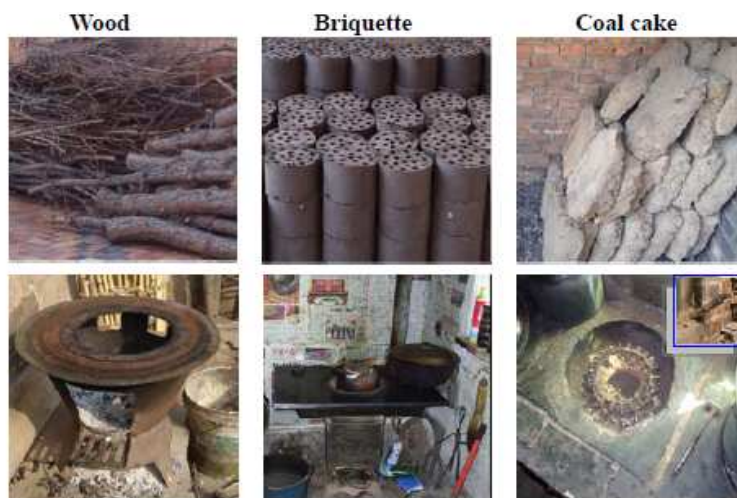

**Figure S1.** Pictures of the fuel and stove tested in this study. Three different fuel/stove combinations were investigated: wood burned in a simple metal stove, honmeycomb briquette burned in an improved metallic stove with a chimney, and coal cake burned in a brick stove with an outdoor flue pipe (from left to the right).

**Table S1.** Fuel moisture (% wet basis) and proximate analysis (% dry basis) for briquette, coal cake and wood investigated in this study.

|                 | Briquette | Coal cake | Wood |
|-----------------|-----------|-----------|------|
| Moisture        | 1.5       | 2.1       | 5.4  |
| Volatile matter | 11        | 6.1       | 83   |
| Ash             | 47        | 87        | 1.0  |
| Fixed carbon    | 42        | 6.8       | 16   |

The temperature protocol used in EC/OC analysis is listed in **Table S2**. The protocol used here was a modified one similar to the National Institute of Occupational Safety and Health (NIOSH) 5040, as recommended by the manufacturer. Briefly, it was increased to 600 (90 s), 840 °C (90 s) in a pure helium atmosphere for OC detection, and then 550 (35 s), 650 (45 s) and 870 (90 s) °C in an oxygen/helium atmosphere for EC detection.

**Table S2.** EC/OC analysis temperature protocol (rtquartz.par) in this study using a Sunset analyzer (RT-4)

| Mode   | Time, s | Temperature, °C | Power constant | Time constant, s | Blower mode |
|--------|---------|-----------------|----------------|------------------|-------------|
| Helium | 10      | 1               | 0.001          | 95               | 0           |
| Helium | 90      | 600             | 20             | 40               | 0           |
| Helium | 90      | 840             | 32             | 22               | 0           |
| Helium | 35      | 0               | 0.001          | 95               | 16          |
| Helium | 1       | 550             | 20             | 50               | 0           |
| Oxygen | 35      | 550             | 18             | 50               | 0           |
| Oxygen | 45      | 650             | 22             | 35               | 0           |
| Oxygen | 90      | 870             | 32             | 22               | 0           |

|               |     |   |       |    |    |
|---------------|-----|---|-------|----|----|
| CalibrationOx | 110 | 0 | 0.001 | 95 | 16 |
| OFFLINE       | 1   | 0 | 0.001 | 95 | 16 |

**Table S3.** Instrumental detection limit (defined as 3 times signal-to-noise ratio), method detection limit (defined as 3.14 times the standard deviation of 7 replicated analyses of spiked samples) and recoveries of individual parent PAHs, oxy- and nitro-PAHs.

|                                 | IDL, ng | MDL, ng/mL |                | Recovery |                |  |
|---------------------------------|---------|------------|----------------|----------|----------------|--|
|                                 |         | gaseous    | particle phase | gaseous  | particle phase |  |
| <b>Parent-PAHs</b>              |         |            |                |          |                |  |
| naphthalene (NAP)               | 0.40    | 0.99       | 0.32           | 0.70     | 0.74           |  |
| acenaphthylene (ACY)            | 0.13    | 0.63       | 0.24           | 0.83     | 0.68           |  |
| acenaphthene (ACE)              | 0.43    | 0.49       | 0.31           | 0.73     | 0.71           |  |
| fluorene (FLO)                  | 0.76    | 0.64       | 0.25           | 0.95     | 0.83           |  |
| phenanthrene (PHE)              | 0.78    | 0.53       | 1.18           | 0.89     | 0.73           |  |
| anthracene (ANT)                | 0.48    | 0.84       | 0.50           | 1.01     | 0.77           |  |
| fluoranthene (FLA)              | 0.31    | 1.26       | 0.91           | 1.14     | 0.78           |  |
| pyrene (PYR)                    | 0.38    | 1.26       | 0.95           | 1.21     | 0.80           |  |
| retene (RET)                    | 0.31    | 0.74       | 0.40           | 1.04     | 0.85           |  |
| benzo[c]phenanthrene (BcP)      | 0.35    | 0.88       | 0.54           | 0.89     | 0.90           |  |
| cyclopenta[c,d]pyrene (CPP)     | 0.40    | 0.90       | 0.50           | 0.92     | 0.90           |  |
| benzo(a)anthracene (BaA)        | 0.35    | 0.97       | 0.67           | 0.85     | 0.85           |  |
| chrysene (CHR)                  | 0.41    | 1.06       | 0.77           | 0.90     | 0.98           |  |
| benzo(b)fluoranthene (BbF)      | 0.30    | 0.91       | 1.20           | 0.80     | 1.21           |  |
| benzo(k)fluoranthene (BkF)      | 0.48    | 1.71       | 1.23           | 1.08     | 0.99           |  |
| benzo(a)pyrene (BaP)            | 0.47    | 1.43       | 1.03           | 1.01     | 0.80           |  |
| benzo(e)pyrene (BeP)            | 0.47    | 1.43       | 1.02           | 0.95     | 0.80           |  |
| perylene (PER)                  | 0.23    | 0.68       | 1.02           | 0.94     | 0.79           |  |
| indeno(1,2,3-cd)pyrene (IcdP)   | 0.31    | 0.82       | 1.05           | 0.72     | 1.20           |  |
| dibenz(a,h)anthracene (DahA)    | 0.93    | 1.28       | 0.98           | 0.83     | 1.03           |  |
| benzo(g,h,i)perylene (BghiP)    | 0.93    | 1.32       | 1.42           | 0.90     | 0.97           |  |
| dibenzo[a,c]pyrene (DacP)       | 0.90    | 1.10       | 1.30           | 0.80     | 0.96           |  |
| dibenzo[a,l]pyrene (DalP)       | 0.84    | 1.01       | 0.92           | 0.75     | 0.99           |  |
| dibenzo[a,e]fluoranthene (DaeF) | 0.85    | 1.00       | 1.02           | 0.78     | 1.05           |  |
| Coronene(COR)                   | 0.78    | 0.99       | 1.04           | 0.98     | 0.98           |  |
| dibenzo[a,e]pyrene (DaeP)       | 0.89    | 1.33       | 1.25           | 0.86     | 1.35           |  |
| dibenzo[a,i]pyrene (DaiP)       | 0.92    | 1.03       | 1.10           | 0.88     | 1.00           |  |
| dibenzo[a,h]pyrene (DahP)       | 0.90    | 1.05       | 1.08           | 0.90     | 0.98           |  |
| <b>Oxy-PAHs</b>                 |         |            |                |          |                |  |
| 9-fluorenone (9FO)              | 0.06    | 0.43       | 0.08           | 0.72     | 0.53           |  |
| anthracene-9,10-dione (ATQ)     | 0.24    | 0.84       | 0.30           | 0.96     | 0.81           |  |
| benzanthrone (BZO)              | 0.13    | 0.54       | 0.44           | 0.84     | 0.87           |  |
| benzo[a]anthracene-dione(BaAQ)  | 0.12    | 0.59       | 0.24           | 0.80     | 0.71           |  |
| <b>Nitro-PAHs</b>               |         |            |                |          |                |  |
| 1-nitro-naphthalene (1N-NAP)    | 0.12    | 0.44       | 0.67           | 0.72     | 0.83           |  |

|                               |      |      |      |      |      |
|-------------------------------|------|------|------|------|------|
| 2-nitro-naphthalene (2N-NAP)  | 0.24 | 0.57 | 0.71 | 0.83 | 0.84 |
| 5-nitro-acenaohthene (5N-ACE) | 0.12 | 0.58 | 0.75 | 0.77 | 0.88 |
| 2-nitro-fluorene (2N-FLO)     | 0.24 | 0.64 | 0.75 | 0.83 | 0.90 |
| 9-nitro-anthracene (9N-ANT)   | 0.12 | 0.56 | 0.64 | 0.68 | 0.76 |
| 9-nitro-phenanthrene (9N-PHE) | 0.12 | 0.56 | 0.73 | 0.71 | 0.86 |
| 3-nitro-phenanthrene (3N-PHE) | 0.13 | 0.71 | 0.74 | 0.79 | 0.90 |
| 3-nitro-fluoranthene (3N-FLA) | 0.24 | 0.75 | 0.74 | 0.82 | 0.87 |
| 1-nitro-pyrene (1N-PYR)       | 0.12 | 0.67 | 0.82 | 0.78 | 0.83 |

**Table S4.** EFs (mg/kg) of individual parent PAHs, oxy- and nitro-PAHs from residential briquette, coal cake, and wood combustions. Data shown are the range from duplicate measurements.

|                                 | Briquette     | Coal Cake   | Wood        |
|---------------------------------|---------------|-------------|-------------|
| <b>Parent-PAHs</b>              |               |             |             |
| naphthalene (NAP)               | 2.2-3.2       | 18-87       | 9.3-172     |
| acenaphthylene (ACY)            | 0.59-0.82     | 32-42       | 15-28       |
| acenaphthene (ACE)              | 0.052-0.086   | 1.7-2.1     | 1.3-2.0     |
| fluorene (FLO)                  | 0.29-0.42     | 9.5-9.6     | 4.1-4.9     |
| phenanthrene (PHE)              | 3.0-3.5       | 26-29       | 16-22       |
| anthracene (ANT)                | 0.33-0.38     | 8.1-9.1     | 3.5-4.6     |
| fluoranthene (FLA)              | 2.2-2.3       | 11-14       | 14-26       |
| pyrene (PYR)                    | 1.6-1.7       | 8.6-11      | 13-23       |
| retene (RET)                    | 0.058-0.11    | 0.70-0.85   | 0.88-8.1    |
| benzo[c]phenanthrene (BcP)      | 0.14-0.16     | 0.99-1.5    | 1.0-1.9     |
| cyclopenta[c,d]pyrene (CPP)     | 0.022-0.11    | 7.8-12      | 12-22       |
| benzo(a)anthracene (BaA)        | 0.58-0.74     | 4.3-6.6     | 4.5-8.1     |
| chrysene (CHR)                  | 1.2-1.3       | 2.8-4.2     | 3.6-6.6     |
| benzo(b)fluoranthene (BbF)      | 0.31-0.38     | 2.0-2.9     | 2.7-4.2     |
| benzo(k)fluoranthene (BkF)      | 0.24-0.30     | 1.8-2.5     | 3.0-4.5     |
| benzo(a)pyrene (BaP)            | 0.20-0.22     | 0.95-1.3    | 1.7-2.6     |
| benzo(e)pyrene (BeP)            | 0.068-0.077   | 2.4-3.4     | 3.8-5.9     |
| perylene (PER)                  | 0.0094-0.0096 | 0.43-0.55   | 0.62-0.96   |
| indeno(1,2,3-cd)pyrene (IcdP)   | 0.034-0.035   | 1.8-2.7     | 2.7-3.9     |
| dibenz(a,h)anthracene (DahA)    | 0.018-0.019   | 0.19-0.32   | 0.33-0.39   |
| benzo(g,h,i)perylene (BghiP)    | 0.033-0.034   | 0.86-1.3    | 1.9-2.7     |
| dibenzo[a,c]pyrene (DacP)       | 0.0014-0.0018 | 0.67-0.67   | 0.78-1.5    |
| dibenzo[a,l]pyrene (DalP)       | 0.0050-0.0067 | 0.41-0.58   | 0.36-0.55   |
| dibenzo[a,e]fluoranthene (DaeF) | 0.0022-0.0039 | 0.31-0.39   | 0.33-0.37   |
| Coronene(COR)                   | 0.0055-0.0066 | 0.75-1.2    | 2.2-2.6     |
| dibenzo[a,e]pyrene (DaeP)       | 0.0084-0.012  | 0.23-0.39   | 0.16-0.39   |
| dibenzo[a,i]pyrene (DaiP)       | 0.0014        | 0.27-0.47   | 0.22-0.45   |
| dibenzo[a,h]pyrene (DahP)       | n.d.*         | 0.048-0.067 | 0.053-0.097 |
| <b>Oxy-PAHs</b>                 |               |             |             |
| 9-fluorenone (9FO)              | 1.1-1.8       | 3.4-4.1     | 2.9-4.1     |

|                                |             |             |            |
|--------------------------------|-------------|-------------|------------|
| anthracene-9,10-dione (ATQ)    | 0.50-0.68   | 0.69-1.5    | 1.5-2.0    |
| benzanthrone (BZO)             | 0.077-0.16  | 0.65-3.8    | 3.44-3.89  |
| benzo[a]anthracene-dione(BaAQ) | 0.014-0.018 | 0.018-0.062 | 0.096-0.15 |

#### Nitro-PAHs

|                               |                 |                 |               |
|-------------------------------|-----------------|-----------------|---------------|
| 1-nitro-naphthalene (1N-NAP)  | 0.00038-0.00049 | 0.0037-0.0041   | 0.0098-0.011  |
| 2-nitro-naphthalene (2N-NAP)  | 0.00071-0.0012  | 0.0043-0.0045   | 0.010-0.011   |
| 5-nitro-acenaohthene (5N-ACE) | 0.00032-0.00062 | 0.0011-0.0033   | 0.0054-0.0070 |
| 2-nitro-fluorene (2N-FLO)     | 0.00063-0.00067 | 0.0012-0.0033   | 0.0047-0.0068 |
| 9-nitro-anthracene (9N-ANT)   | 0.47-0.59       | 0.13-2.1        | 0.04-0.33     |
| 9-nitro-phenanthrene (9N-PHE) | 0.16-0.24       | 0.016-0.35      | 0.042-0.18    |
| 3-nitro-phenanthrene (3N-PHE) | 0.00022-0.00025 | 0.00030-0.00088 | 0.0015-0.0020 |
| 3-nitro-fluoranthene (3N-FLA) | 0.00073-0.00075 | 0.00057-0.0017  | 0.0052-0.010  |
| 1-nitro-pyrene (1N-PYR)       | 0.0011-0.0017   | 0.0030-0.0053   | 0.0059        |

\*: n.d. not detected.

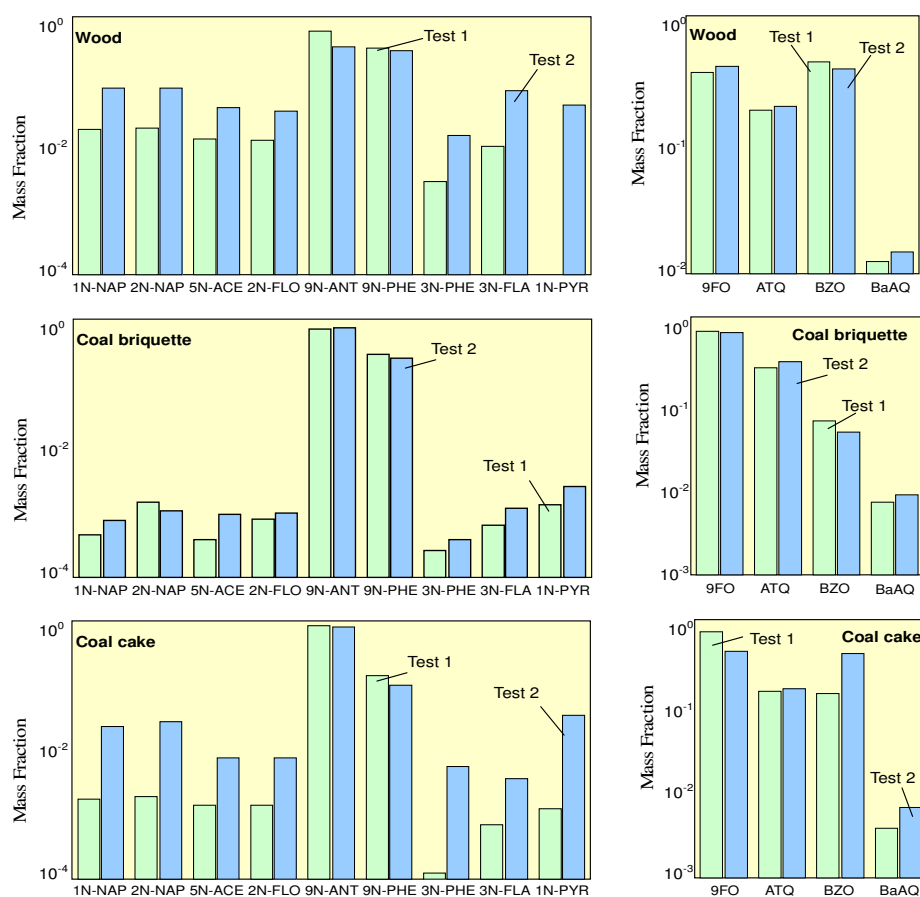

**Figure S2.** Normalized mass percentages of 4 oxygenated and 9 nitro PAHs (gaseous and particle-phase combined) for the wood, coal cake and coal briquette, respectively.

**Table S5.** Comparison of EFs of PM, OC, EC, parent PAHs and their derivatives measured from residential wood and coal combustion in rural China.

| Fuel                                          | Stove                                                    | PM                       | OC        | EC            | pPAHs                  | oPAHs   | nPAHs     | reference                  |
|-----------------------------------------------|----------------------------------------------------------|--------------------------|-----------|---------------|------------------------|---------|-----------|----------------------------|
|                                               |                                                          | g/kg                     | g/kg      | g/kg          | mg/kg                  | mg/kg   | mg/kg     |                            |
| <b>Field measurement</b>                      |                                                          |                          |           |               |                        |         |           |                            |
| Wood                                          | A movable metal stove without chimney                    | 8.1-8.5                  | 2.2-3.6   | 0.91-1.6      | 182-297 <sup>[1]</sup> | 7.8-10  | 0.14-0.55 | This study                 |
|                                               | An improved stove with two pot, no grate                 | 2.95-4.58 <sup>[2]</sup> | 0.41-1.43 | 1.03-3.26     |                        |         |           | Li <i>et al.</i> , 2009    |
|                                               | An improved stove with one pot, bottom grate             | 2.67±0.42 <sup>[2]</sup> | 1.07±0.16 | 1.14±0.24     |                        |         |           | Li <i>et al.</i> , 2009    |
|                                               | Stove/kang, one pot, no grate with a flue <sup>[3]</sup> | 3.04±0.85 <sup>[2]</sup> | 0.98±0.32 | 1.32±0.39     |                        |         |           | Li <i>et al.</i> , 2009    |
| Briquette                                     | An improved stove with a chimney                         | 0.54-0.64                | 0.13-0.14 | 0.0040-0.0041 | 14-16 <sup>[4]</sup>   | 1.7-2.6 | 0.64-0.83 | This study                 |
| Coal cake                                     | A brick stove with an outdoor flue                       | 3.2-8.5                  | 0.38-0.58 | 0.022-0.052   | 168-223 <sup>[4]</sup> | 4.7-9.5 | 0.16-2.4  | This study                 |
| <b>Combustion under laboratory conditions</b> |                                                          |                          |           |               |                        |         |           |                            |
| Wood                                          | Brick stove with a flue                                  | 1.54±0.20                |           |               |                        |         |           | Zhang <i>et al.</i> , 2000 |

|           |                                                                           |            |            |             |                         |           |               |                                |
|-----------|---------------------------------------------------------------------------|------------|------------|-------------|-------------------------|-----------|---------------|--------------------------------|
|           | Improved brick stove with a flue                                          | 4.10±1.5   |            |             |                         |           |               | Zhang <i>et al.</i> , 2000     |
|           | Metal stove without flue                                                  | 2.67±1.20  |            |             |                         |           |               | Zhang <i>et al.</i> , 2000     |
|           | A typical brick stove/kang with one pot and an outdoor flue               | 1.6±0.32   | 0.60±0.35  | 0.94±0.40   | 6.4±2.8 <sup>[4]</sup>  | 0.37±0.27 | 0.0051±0.0029 | Shen <i>et al.</i> , 2012      |
| Briquette | Metal stove without flue                                                  | 0.27±0.073 |            |             |                         |           |               | Zhang <i>et al.</i> , 2000     |
|           | Metal stove with a flue                                                   | 0.22±0.11  |            |             |                         |           |               | Zhang <i>et al.</i> , 2000     |
|           | Improved metal stove without flue                                         | 0.48±0.57  |            |             |                         |           |               | Zhang <i>et al.</i> , 2000     |
|           | Metal stove with a flue <sup>[5]</sup>                                    | 0.62±0.73  |            |             |                         |           |               | Zhang <i>et al.</i> , 2000     |
|           | A metallic outer cover and thermal-insulated ceramic liner <sup>[6]</sup> | 1.33-19.6  | 0.017-13.8 | 0.004-0.675 | 69.0-160 <sup>[7]</sup> |           |               | Chen <i>et al.</i> , 2005      |
|           | A traditional portable stove                                              | 2.78-26.4  | 1.91-13.0  | 0.044-0.64  |                         |           |               | Zhi <i>et al.</i> , 2008, 2009 |
|           | An improved stove with an upper lid and a                                 | 2.54-9.85  | 1.02-6.17  | 0.011-0.16  |                         |           |               | Zhi <i>et al.</i> , 2008, 2009 |

|           |                                                                       |              |              |               |                                         |            |  |                                   |
|-----------|-----------------------------------------------------------------------|--------------|--------------|---------------|-----------------------------------------|------------|--|-----------------------------------|
|           | flue                                                                  |              |              |               |                                         |            |  |                                   |
|           | Stoves with single or double flues                                    |              |              |               | 186-812 <sup>[8]</sup>                  |            |  | Liu <i>et al.</i> , 2009          |
|           | A metallic outer cover and thermal-insulated ceramic liner            |              |              |               | 0.049 <sup>[7]</sup>                    |            |  | Chen <i>et al.</i> , 2004         |
|           | A movable metallic stove without flue                                 | 0.17±0.010   | 0.021±0.0020 | 0.0042±0.0021 | 14±3.1 <sup>[9]</sup>                   | 0.29±0.016 |  | Shen <i>et al.</i> , 2010a, 2010b |
|           | A Stove with a flue, a cylinder 24 cm in diameter and 50 cm in height | 0.614±0.0248 |              |               | 0.011±0.0093 (only BaP) <sup>[10]</sup> |            |  | Ge <i>et al.</i> , 2004           |
| Coal cake | A Stove with a flue, a cylinder 24 cm in diameter and 50 cm in height | 0.995±0.0609 |              |               | 0.0021±0.0022 (only BaP)                |            |  | Ge <i>et al.</i> , 2004           |

[1] EFs of a total of 28 PAHs analyzed by GC-MS. Results are gas- and particle-phase combined.

[2] PM<sub>2.5</sub> measured in the study

[3] The fuel was branch

[4] Analysis methods were the same as those for the wood, and the results are gas- and particle-phase combined.

[5] Honeycomb coal from a special coal mine in Shanxi



- [6] A variety of coals (1 anthracite, 1 sub-bituminous and 3 bituminous coals) were burned.
- [7] 14 parent PAHs in both gaseous and particle phases.
- [8] 15 PAHs (except for NAP) were analyzed by GC-MS. Results are total PAHs in both gaseous and particulate phases.
- [9] 16 PAHs in both gaseous and particle phases. Analytical methods were the same as those in this study.
- [10] BaP was analyzed by HPLC. Results are total BaP in both gaseous and particle phases.

### Reference:

- Chen, Y.; Sheng, G.; Bi, X.; Feng, Y.; Mai, B.; Fu, J. Emission factors for carbonaceous particles and polycyclic aromatic hydrocarbons from residential coal combustion in China. *Environ. Sci. Technol.* **2005**, *39*(6), 1861-7.
- Chen, Y.; Bi, X.; Mai, B.; Sheng, G.; Fu, J. Emission characterization of particulate/gaseous phases and size association for polycyclic aromatic hydrocarbons from residential coal combustion. *Fuel*. **2004**, *83*, 781-790.
- Ge, S.; Xu, X.; Chow, J.; Watson, J.; Sheng, Q.; Liu, W.; Bai, Z.; Zhu, T.; Zhang, J. Emissions of air pollutants from household stoves: honeycomb coal versus coal cake. *Environ. Sci. Technol.* **2004**, *38*, 4612-4618.
- Li, X.; Wang, S.; Duan, L.; Hao, J.; Nie, Y. Carbonaceous aerosol emissions from household biofuel combustion in China. *Environ. Sci. Technol.*, **2009**, *43*(15), 6076-6081.
- Liu, W.; Dou, H.; Wei, Z.; Chang, B.; Qiu, W.; Liu, Y.; Tao, S. Emission characteristics of polycyclic aromatic hydrocarbons from combustion of different residential coals in North China. *Sci. Total Environ.* **2009**, *407*, 1436-1446.
- Shen, G.; Yang, Y.; Wang, W.; Tao, S.; Zhu, C.; Min, Y.; Xue, M.; Ding, J.; Wang, B.; Wang, R.; Shen, H.; Li, W.; Wang, X.; Russell, A. Emission factors of particulate matter and elemental carbon for crop residues and coals burned in typical household stoves in China. *Environ. Sci. Technol.* **2010a**, *44*(18), 7157-7162.
- Shen, G.; Wang, W.; Yang, Y.; Zhu, C.; Min, Y.; Xue, M.; Ding, J.; Li, W.; Wang, B.; Shen, H.; Wang, R.; Wang, X.; Tao, S. Emission factors and particulate matter size distribution of polycyclic aromatic hydrocarbons from residential coal combustions in rural Northern China. *Atmos. Environ.* **2010b**, *44*(39), 5237-5243.
- Shen, G.; Tao, S.; Wei, S.; Zhang, Y.; Wang, R.; Wang, B.; Li, W.; Shen, H.; Huang, Y.; Chen, Y.; Chen, H.; Yang, Y.; Wang, W.; Wang, X.; Liu, W.; Simonich, S. Emissions of parent, nitro, and oxygenated polycyclic aromatic hydrocarbons from residential wood combustion in rural China. *Environ. Sci. Technol.* **2012**, *46*(15), 8123-8130.

Zhang, J.; Smith, K.; Ma, Y.; Ye, S.; Jiang, F.; Qi, W.; Liu, P.; Khalil, M.; Rasmussen, R.; Thorneloe, S. Greenhouse gases and other airborne pollutants from household stoves in China: a database for emission factors. *Atmos. Environ.* **2000**, *34*(26), 4537-4549.

Zhi, G.; Chen, Y.; Feng, Y.; Xiong, S.; Li, J.; Zhang, G.; Sheng, G.; Fu, J. Emission characteristics of carbonaceous particles from various residential coal-stoves in China. *Environ. Sci. Technol.* **2008**, *42*(9), 3310-3315.

Zhi, G.; Peng, C.; Chen, Y.; Liu, D.; Sheng, G.; Fu, J. Deployment of coal briquettes and improved stoves: possibly an option for both environment and climate. *Environ. Sci. Technol.* **2009**, *43*(15), 5586-5591.
